# Supplementary material
Source: MDPI journal article supplement (https://www.mdpi.com/2072-4292/10/5/796)
Supplement: s1 [file s1]

# Supplementary Materials: Performance of Solar-Induced Chlorophyll Fluorescence in Estimating Water-Use Efficiency in a Temperate Forest

Xiaoliang Lu <sup>1,2</sup>, Zhunqiao Liu <sup>2,3</sup>, Yuyu Zhou <sup>4</sup>, Yaling Liu <sup>5</sup> and Jianwu Tang <sup>2,\*</sup>

<sup>1</sup> Department of Forest Ecosystems and Society, Oregon State University, Corvallis, OR 97331, USA; luxiaoliangresearch@gmail.com

<sup>2</sup> The Ecosystems Center, Marine Biological Laboratory, Woods Hole, MA 02543, USA; liuzhunqiao@gmail.com

<sup>3</sup> School of life sciences, Nanjing University, Xianlin Campus, 163 Xianlin Road, Nanjing, Jiangsu 210023, China

<sup>4</sup> Department of Geological and Atmospheric Sciences, Iowa State University, Ames, IA 50011, USA; yuyuzhou@iastate.edu

<sup>5</sup> Department of Earth and Environmental Engineering, Columbia University, 500 W. 120th St, 918 S. W. Mudd Hall, 500, New York, NY 10027, USA; yl3937@columbia.edu

\* Corresponding: jtang@mbi.edu; Tel.: +1-508-289-7162

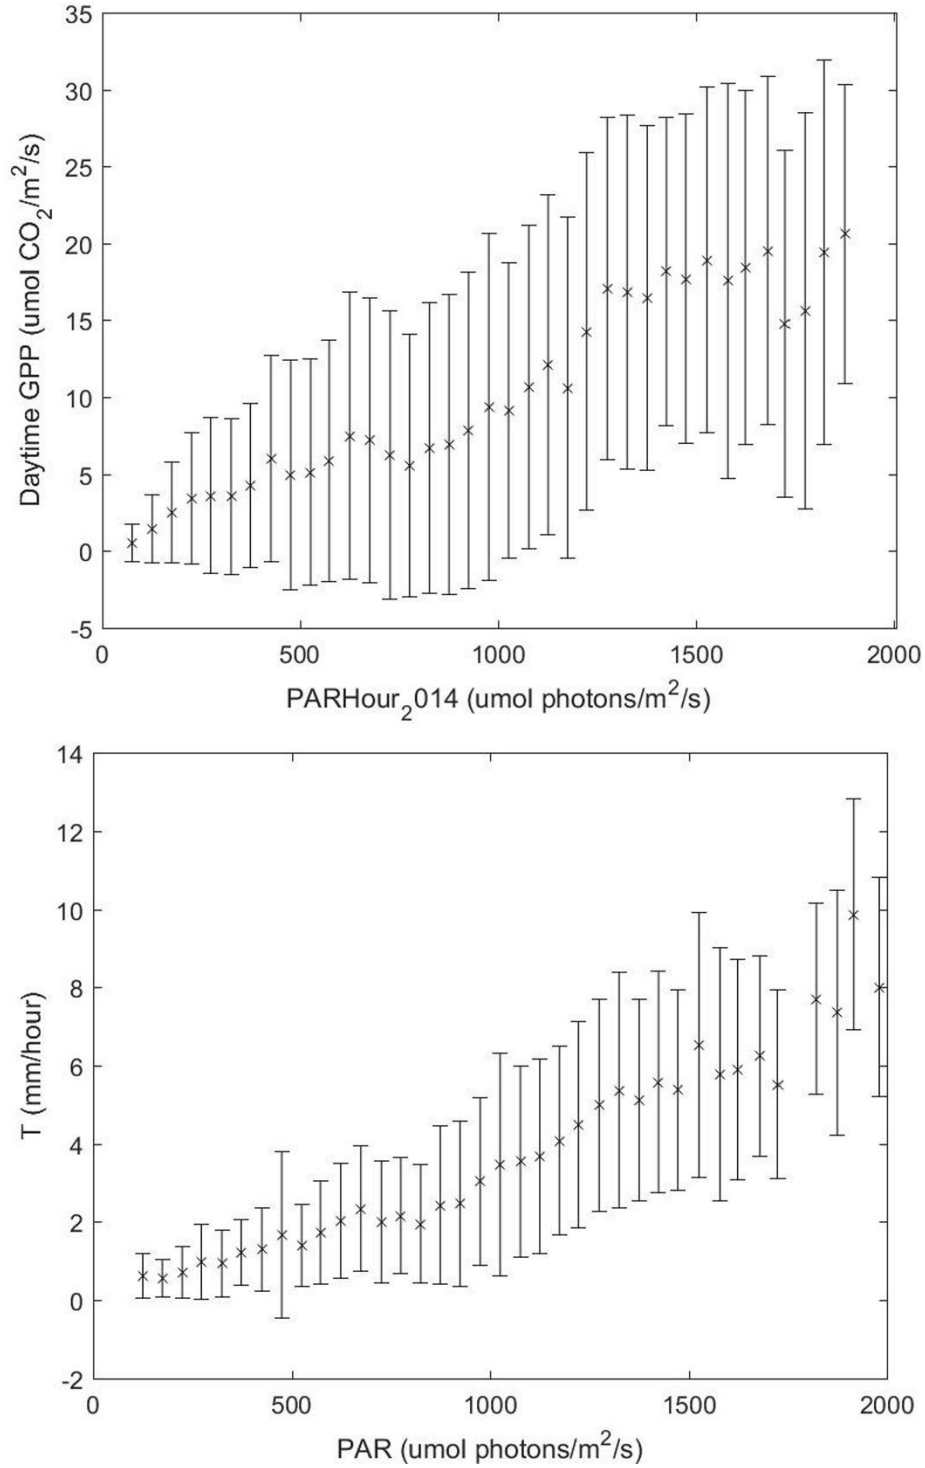

**Figure S1.** The responses of hourly daytime (a) gross primary production (GPP, umol CO<sub>2</sub> m/s) and (b) transpiration ( $T$ , mm/hour) to incident photosynthetically active radiation (PAR,  $\mu\text{mol photons/m}^2/\text{s}$ ) during the growing season in 2014. The hourly ET time series was bin-averaged into 50  $\mu\text{mol photons/m}^2/\text{s}$  increment for PAR. Bars represent standard errors.

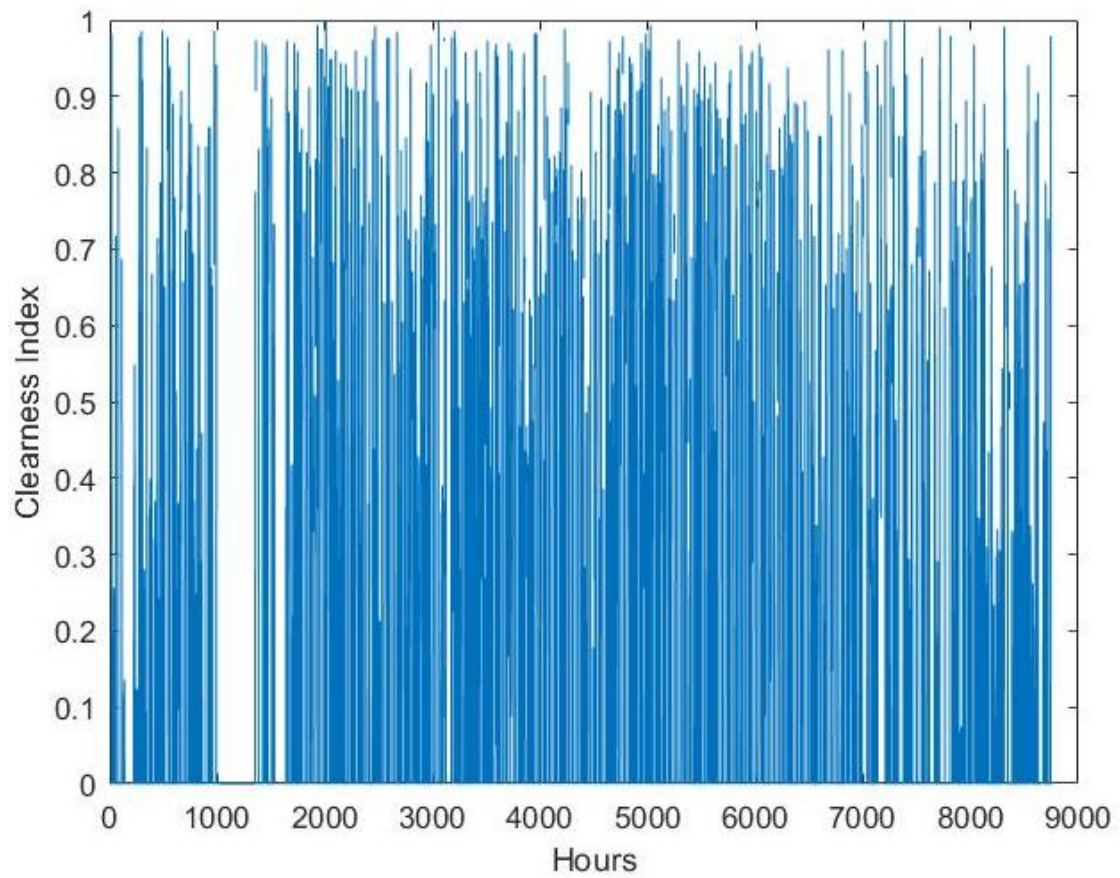

**Figure S2.** The hourly clearness index ([Gu et al., 1999](#)) at the Harvard site in 2014.

**Table S1.** The correlation coefficient ( $R^2$ ) of the training and testing groups in predicting daily water use efficiency (WUE), intrinsic water use efficiency ( $WUE_i$ ), inherent water use efficiency (IWUE) and underlying water use efficiency (uWUE) by using the linear regression analysis (LR) and Gaussian processes regression (GPR), respectively. The training group has 60% of all daily measurements and the test group has the rest. The  $R^2$  estimated from the testing group are provided in the parentheses.

|                                                                 | WUE         |             | $WUE_i$     |             | IWUE        |             | uWUE        |             |
|-----------------------------------------------------------------|-------------|-------------|-------------|-------------|-------------|-------------|-------------|-------------|
|                                                                 | LR          | GPR         | LR          | GPR         | LR          | GPR         | LR          | GPR         |
| SIF <sub>687</sub>                                              | 0.00 (0.00) | 0.01 (0.00) | 0.02 (0.01) | 0.02 (0.01) | 0.20 (0.16) | 0.38 (0.33) | 0.09 (0.06) | 0.34 (0.32) |
| SIF <sub>720</sub>                                              | 0.13 (0.13) | 0.39 (0.35) | 0.31 (0.26) | 0.30 (0.27) | 0.48 (0.44) | 0.53 (0.47) | 0.42 (0.38) | 0.41 (0.39) |
| SIF <sub>761</sub>                                              | 0.14 (0.11) | 0.40 (0.38) | 0.39 (0.35) | 0.48 (0.43) | 0.58 (0.55) | 0.58 (0.51) | 0.43 (0.39) | 0.52 (0.48) |
| SIF <sub>720</sub> , SIF <sub>761</sub>                         | 0.15 (0.11) | 0.50 (0.50) | 0.48 (0.43) | 0.48 (0.41) | 0.60 (0.56) | 0.60 (0.56) | 0.50 (0.47) | 0.58 (0.54) |
| SIF <sub>687</sub> ,<br>SIF <sub>720</sub> , SIF <sub>761</sub> | 0.21 (0.18) | 0.52 (0.47) | 0.50 (0.46) | 0.60 (0.55) | 0.61 (0.58) | 0.62 (0.57) | 0.51 (0.44) | 0.60 (0.52) |

### Retrieve SIF at the absorption lines

It is important to note that canopy-level radiance ( $L(\lambda)$ ) at wavelength  $\lambda$  received by the spectrometer contains contributions from two sources including reflected solar energy ( $r(\lambda) * \frac{I(\lambda)}{\pi}$ ) and upwelling SIF emission ( $F(\lambda)$ ), that is:

$$L(\lambda) = r(\lambda) * \frac{I(\lambda)}{\pi} + F(\lambda) \quad (1)$$

where  $I(\lambda)$  is down-welling incoming solar irradiance; both  $L(\lambda)$  and  $I(\lambda)$  are provided by the SIF observation system. At some absorption lines caused by either atmosphere absorption bands or the Fraunhofer lines, however,  $r(\lambda)$  and  $F(\lambda)$  can be represented by some mathematical functions (Zhao et al., 2014). Within the spectral range from 680 nm to 775 nm, there are three main absorption lines including O<sub>2</sub>-B at 687 nm, water vapor at 720 nm and O<sub>2</sub>-A at 761 nm (Table S2).

**Table S2.** The central wavelengths and spectral ranges of the absorption lines used for retrieving SIF emission.

| Absorption lines  | Central Wavelength (nm) | Spectral Range (nm) |
|-------------------|-------------------------|---------------------|
| O <sub>2</sub> -B | 687                     | 683–692             |
| Water vapor       | 720                     | 714–722             |
| O <sub>2</sub> -A | 761                     | 757–771             |

Following the Spectral Fitting Method (SFM) proposed by Zhao et al (2014), we can express  $r(\lambda)$  and  $F(\lambda)$  by using the second order Taylor polynomials at these three lines ( $\lambda$ ):

$$r(\lambda) = b_1 + b_2 * (\lambda - \lambda_c) + b_3 * (\lambda - \lambda_c)^2 \quad (2)$$

$$F(\lambda) = b_4 + b_5 * (\lambda - \lambda_c) + b_6 * (\lambda - \lambda_c)^2 \quad (3)$$

where  $\lambda_c$  are the central wavelengths of the absorption lines (Table S2).  $b_1, b_2, b_3, b_4, b_5$  and  $b_6$  are six unknown coefficients in the above two equations. Combining Eq. (1), (2) and (3), we have:

$$L(\lambda) = (\lambda - \lambda_c)^2 * \frac{I(\lambda)}{\pi} * b_6 + (\lambda - \lambda_c) * \frac{I(\lambda)}{\pi} * b_5 + \frac{I(\lambda)}{\pi} * b_4 + (\lambda - \lambda_c)^2 * b_3 + (\lambda - \lambda_c) * b_2 + b_1 \quad (4)$$

To separate  $r(\lambda)$  and  $F(\lambda)$  at a specific absorption line, one needs at least six measurements values of  $L(\lambda)$  and  $I(\lambda)$  within corresponding spectral range. After this step, we should have SIF emission at the three absorption lines named  $F(687)$ ,  $F(720)$  and  $F(761)$  at each instantaneous time step.

Due to poor weather conditions such as scattered clouds and heavy rainfall, some  $F(\lambda)$  may have negative values which were removed from the further analysis.

## References

- Gu, L.H.; Fuentes, J.D.; Shugart, H.H.; Staebler, R.M.; Black, T.A. Responses of net ecosystem exchanges of carbon dioxide to changes in cloudiness: Results from two North American deciduous forests. *J. Geophys. Res.-Atmos.* **1999**, *104*, 31421-31434.
- Zhao, F.; Guo, Y.Q.; Verhoef, W.; Gu, X.F.; Liu, L.Y.; Yang, G.J. A method to reconstruct the solar-induced canopy fluorescence spectrum from hyperspectral measurements. *Remote Sensing* **2014**, *6*, 10171-10192.
